# Supplementary material for: Technical note: Separating signal from noise in large-domain hydrologic model evaluation – Benchmarking model performance under sampling uncertainty
Source: Copernicus journal article supplement (doi:10.5194/egusphere-2025-6460), 2026-02-02
Supplement: Supplementary file [file egusphere-2025-6460-AC1-supplement.pdf]

## Response to reviewer 1

The authors provide a nice and easy-to-read study on large-domain hydrological model evaluation. They introduced benchmarks as a valuable tool to investigate where a large domain hydrologic model might still lack in performance. This makes the manuscript, in my opinion, very interesting for a wider hydrological audience. Before publication, however, I think the manuscript would benefit from a bit more analysis on why the model is failing in certain areas. Below, I try to give some constructive feedback for the authors to consider:

Thank you for your comments. It has been very helpful to understand which parts of our reasoning you think should be clarified. Please see our responses to your individual comments below.

General remarks:

- I have the feeling that a simple explanation of why a model fails if it is worse than a certain benchmark would help readers to understand the point of this technical note.

We will restructure the introduction to more sharply focus on the benchmarking problem our technical note addresses and include an example using the Nash-Sutcliffe Efficiency. Most readers will be familiar with the NSE, and it can therefore show how and why comparing a model to a benchmark is useful (because that is one possible way of interpreting the NSE), as well as highlight the need to improve our benchmarking (because the benchmark included in NSE does not impose strong constraints on model performance):

“The deliberate use of benchmarks can provide a helpful frame of reference for interpreting efficiency scores such as NSE and KGE, by setting realistic expectations of the possible performance in each basin (Seibert, 2001; Schaefli and Gupta, 2007; Legates and McCabe, 2013; Seibert et al., 2018; Beven, 2023; Knoben, 2024). A well-known example follows from a specific interpretation of the Nash-Sutcliffe Efficiency (Nash and Sutcliffe, 1970):

$$NSE = 1 - \frac{\sum_{t=1}^N (q_{obs}(t) - q_{sim}(t))^2}{\sum_{t=1}^N (q_{obs}(t) - \bar{q}_{obs})^2},$$

where  $q_{obs}$  and  $q_{sim}$  are observed and simulated streamflow respectively. This equation can be interpreted as a skill score that quantifies how much of the variance in  $q_{obs}$  the model (through  $q_{sim}$ ) explains compared to the simple benchmark that is the long-term mean flow  $\bar{q}_{obs}$ . Although this specific benchmark is often criticized for the limited constraints it imposes on model performance (e.g. Schaefli and Gupta, 2007), it provides a useful example of a simple benchmark. By comparing the performance of a model against a (much) simpler alternative way of predicting the variable of interest, it becomes easier to evaluate if and how much better the hydrologic model is.”

We'll also make a number of targeted changes to Section 2.4 and the Results section, to ensure that the main point we wish to make (benchmarking reveals areas for model improvement that might be missed with traditional metrics) comes through clearly.

- I have the feeling the Introduction is not well linked to the rest of the manuscript. I did not get the impression that the questions raised were answered. The manuscript does not give any guidance if a score is indicative or useful for a model, nor does it go into quantifying their uncertainty. Isn't the point of the manuscript more to find regions and reasons where the model is failing against the suggested benchmarks? I recommend restructuring the introduction accordingly.

Thank you for bringing this up. We'll rewrite the introduction with a sharper focus on our main question. Key changes:

- Replace the current

"To effectively use these model performance statistics, two questions need to be answered. First, is this score indicative of a useful model for the purpose at hand? Second, how uncertain is this score?"

text at the end of paragraph 2 (line 26-28) with:

**"These scores are useful because the community has relied on them for a long time and they now function as an informal shared test environment (Clark et al., 2026). However, a key challenge remains that the scores calculated by these metrics are difficult to interpret in isolation (e.g., Seibert, 2001; Schaepli and Gupta, 2007; Knoblen, 2024), partly because they tend to conflate model performance and flow variability (Schaepli and Gupta, 2007; Williams, 2025; Clark et al., 2026)."**

This text is then immediately followed by the changes proposed in our previous response.

- Immediately after the NSE example, we propose to add a new paragraph that condenses the current text to increase focus and provide extra support for the use of simple benchmarks:

**"Benchmarks can take various forms, such as regression equations (as used in certain land modeling experiments; e.g., Best et al., 2015), statistics such as persistence or climatology (as common in the streamflow forecasting community; e.g., Harrigan et al., 2023), or different versions of the same model (to see if model changes have the desired effect; e.g., Cosgrove et al., 2024). Benchmarking is also commonly seen when models of varying levels of complexity are compared, particularly in current large-domain modeling exercises that contrast the performance of machine learning methods to more traditional hydrologic models (e.g., Kratzert et al., 2019; Song et al., 2025). The main trade-off between different types of benchmarks is the cost of employing the benchmarks compared to what can be learned from them. For example, the cost of comparing an existing hydrologic model against a second one is often prohibitive because configuration**

is too cumbersome, or run times too long, but comparing the performance of any model against a simple baseline has been common practice as long as the Nash Sutcliffe Efficiency has been in use. Using simple benchmark models, such as the long-term mean, gives some idea of the predictability of the streamflow observations in each basin at negligible computational cost. Our hypothesis is that comparing the performance of a model against the performance of an ensemble of simple benchmarks can be an effective way to identify cases where the performance of a large-domain model is not as high as it could be, irrespective of the absolute values of the scores, and thus where opportunities for model improvement may exist.”

This is then followed by a paragraph on sampling uncertainty and the ending paragraph of the introduction.

We do note that quantifying the (sampling) uncertainty of the scores is plays a main role in the manuscript – it just matters less in this case than in some other applications. We will add histograms to Figure 3 to show how often  $J = 0$  (i.e., sampling uncertainty plays no role). In our main analysis, this is the case in roughly three quarter of the basins. We will ensure this conclusion is emphasized later in the manuscript.

- Discussion: I would like to see a more in-depth discussion on what it actually means if the Benchmark is better than the model. After that, you can go into the analysis, where and why the model might have failed. For this, however, I would recommend putting more emphasis on why the model has failed. Maybe look at it from a model development perspective, what would you need to do to improve the model? Try to give some guidance. E.g., by correlating your J index against catchment attributes (soil, landuse, climate, etc.), and also against the KGE, might give more insights. I acknowledge that the authors already provide some discussion on why the model might fail under certain circumstances, but very few of them are really based on the results of this manuscript and are rather based on the authors' knowledge and other literature.

We hope that our planned changes discussed so far more clearly identify the main point of our paper: that benchmarking reveals areas for model improvement that might be missed with traditional metrics. The NWM retrospective simulations provide a readily available large-domain data set originating from a model that is used operationally, and are therefore a useful test case to show the merits of using benchmarks. Identifying the specific reasons for why the NWM fails is beyond the scope of this work: it would require much more in-depth technical evaluation than is feasible to add to this paper, it should be done with the operational version of the model (not the daily-aggregated retrospective simulations) to be practically useful, and – most importantly – detract from the main point that benchmarking can be a valuable tool in any modeling work, not just this specific one involving the NWM.

Minor comments:

- Title: Is it really fitting what the manuscript is about? I would suggest something like “Technical note: Benchmarking large-domain hydrological model performance”. If the

authors want to state uncertainty in their title, they should be specific what kind of uncertainty they are referring to.

We will reformulate the title as “Technical note: Benchmarking large-domain model performance under sampling uncertainty”.

(Was: Technical note: Separating signal from noise in large-domain hydrologic model evaluation - Benchmarking model performance under sampling uncertainty

We note that “sampling uncertainty” is the commonly used phrase for the uncertainty stemming from the choice of data used to calculate any model performance metric on. We acknowledge the reviewer’s concern that readers may not be familiar with the term however (it is a relatively recent development after all) and will update the abstract to clarify this for the reader (addition in bold):

“Abstract. Large-domain hydrologic modeling studies are becoming increasingly common. The evaluation of the resulting models is however often limited to the use of aggregated performance scores that show where model accuracy is higher and lower. Moreover, the inherent uncertainty in such scores (**i.e., the sampling uncertainty**), stemming from the choice of time periods used for their calculation, often remains unaccounted for.”

- Introduction: What are simple benchmarks exactly, where have they been used, and what's their benefit, how do they relate to hydrological signatures?

The proposed changes to the introduction should address part of this comment already (what are simple benchmarks and what is the benefit of using them?). We will update the text in Section 2.4 where the specific benchmarks are introduced to briefly address where these benchmarks have been used and to note why we use an benchmark ensemble:

“Hydrologic models are increasingly compared to more taxing benchmarks than the long-term mean flow (e.g. Knoben et al., 2020; Towler et al., 2023), but outside the forecasting community (see e.g. Pappenberger et al., 2015) such work is still somewhat limited. Benchmarks also vary in their strengths and weaknesses, and what constitutes a strong benchmark can change regionally (Pappenberger et al., 2015; Knoben, 2024). We therefore compare the performance of the NWM to the performance of an ensemble of simple benchmark models that cover various levels of complexity. A full list of the 17 different benchmark models used in this work can be found in Table 1. These benchmarks are effectively an “ensemble of opportunity”: they are conveniently available in the HydroBM package (Knoben, 2024) and serve to illustrate the point made in the remainder of this paper. We note that this benchmark ensemble is neither exhaustive, nor is it meant to be. However, as long as more theory-driven benchmark selection methods are lacking (i.e., selecting a specific benchmark for a specific basin, based on the benchmark’s suitability for representing the basin’s specific flow regime), ensemble benchmarking methods provide an acceptable alternative.”

There is no immediate relation between the benchmarks and streamflow signatures, and diving into this is a bit beyond the scope of this manuscript.

- **Section 2.4 Benchmarks:** It should be better explained which benchmarks are actually used and why.

The benchmarks are explained in more detail in the Supporting Information, but in hindsight perhaps this information is better placed in the main body of the paper. Reviewer 2 specifically requests this as well. We'll move the information into the main paper and ensure our reasoning for using these is clarified. Text to be added to section 2.4:

“A full list of the 17 different benchmark models used in this work can be found in Table 1. These benchmarks are effectively an “ensemble of opportunity”: they are conveniently available in the HydroBM package and serve to illustrate the point made in the remainder of this paper. We note that this benchmark ensemble is neither exhaustive, nor is it meant to be. However, as long as more theory-driven benchmark selection methods are lacking (i.e., selecting a specific benchmark for a specific basin, based on the benchmark's suitability for representing the basin's specific flow regime), ensemble benchmarking methods provide an acceptable alternative (Knoben, 2024).”

We'll also add a new subsection to Section 2.4 where we describe the benchmarks in more detail than we did previously:

“Each benchmark represents a simple way of predicting the variable of interest (here: streamflow), and thus sets a certain minimum expectation of how well a specific aspect of catchment behavior can be predicted. This in turn can be seen as a test for the model of interest: if the model underperforms compared to the simple alternative, improvements to the modeling chain may be possible. For example, if a model shows consistent bias during low flows but a simple seasonal cycle benchmark does not, this suggests that the flows themselves are relatively stable between years but that the model is somehow unable to replicate this pattern. The benchmark does not immediately point out the underlying causes of the model's bias, but it does show that model performance is not as high as it can be. As shown in Table 1, the benchmarks cover three different categories.

The first category covers simple statistics calculated from the streamflow observations, which are then used as a predictor of streamflow on all time steps. These benchmarks thus quantify the stability of the flow regime in time by using past observations to provide an estimate of how flows at any given point in the future might look, and thus challenge the model to predict deviations from the catchment's typical streamflow behaviour. One example is the long-term mean flow which, if used as a predictor of flow, returns a time series of constant values. This benchmark appears as part of the denominator in the Nash-Sutcliffe efficiency and has been commonly used in hydrology, although often criticized for the limited constraints it imposes on model performance (e.g., Schaeffli & Gupta, 2007) outperforming this benchmark is, in most cases, not very difficult. A second example is the daily mean flow which characterizes the typical seasonal cycle of the flow regime. If the flow in any given year is different from the typical seasonal regime, the model should be

able to predict these deviations. If it does, its performance will be higher than the benchmark's.

The second category covers benchmarks that attempt to account for the influence of precipitation on streamflow. These benchmarks first calculate the average rainfall-runoff ratio (or ratios, in the case of the monthly benchmarks), and then use this ratio to scale incoming precipitation. This approach assumes that the amount of precipitation influences a catchment's streamflow response, but that the ratio of precipitation-to-streamflow conversion does not change markedly throughout time. These benchmarks thus challenge the model to predict deviations from typical rainfall-runoff ratios, which may be the case under prolonged drying or anomalous wet conditions. An example is the benchmark that applies average monthly rainfall runoff ratios to monthly precipitation totals. Despite its coarse temporal resolution (flows within a month are constant), this benchmark has shown considerable performance in a previous large-domain application (Knoben, 2024).

The benchmarks in the third and most complex category are still rather simple one- and two-parameter models whose parameters are optimized using a brute-force approach. These benchmarks attempt to capture the main components of catchment behavior (i.e., partitioning, delayed response, attenuation of precipitation inputs) in parsimonious and aggregated ways. This approach challenges the model to see if the addition of further degrees of freedom (i.e., having more parameters) leads to an appreciable increase in predictive performance. The most complex benchmark in this category is the two-parameter Adjusted Smoothed Precipitation Benchmark (ASPB) proposed by (Schaeffli & Gupta, 2007). This benchmark scales incoming precipitation by the long-term rainfall-runoff ratio to simulate precipitation partitioning, smooths the resulting scaled precipitation with a moving window approach of calibrated length, and then shifts this smoothed response by a calibrated lag value. This provides a two-parameter approximation of the main components of catchment behaviour.”

- Figure 2: Might it be easier to focus on the evaluation period only? And maybe I missed it in the Data and Methods section, but it should be clearly defined what the evaluation period is. Section 2.4 is speaking of a validation period; is this used as a synonym here? If so, it would be better to use only one of the two words throughout the manuscript.

There are three points here:

1. Should Figure 2 focus on the evaluation period only?  
There is value in showing both calibration and evaluation performance of the model and the benchmarks. Calibration performance shows data fitting potential (i.e., how well can a given method – model or benchmark – capture the data at all in a given basin?), whereas evaluation performance shows what sort of predictive power that data fit actually has (i.e., how well can does a given method – model or benchmark – capture underlying processes in a way that’s transferable in time?). We will add this explanation to the text where Figure 2 is discussed, and add text that interprets the results in Fig 2 in this context as well.

2. What is the evaluation period?

This is described in Section 2.4 Benchmarks (underlined for emphasis here):

“We configure the benchmark models in the same way as a regular model application would be structured: the benchmarks are defined using data from a dedicated calibration period (though “calculation period” is a more accurate description for most benchmarks, because only BM 16 and BM17 require parameter calibration) and then used to predict the streamflow in an independent validation evaluation period. We used the same 5-year time period to calibrate the benchmarks as was used to calibrate the NWMv3.0: from 2016-10-01 to 2021-09-30. In case the observation data were incomplete, we used either 4 or 3 water years within that same 5-year window instead. The validation period is all the data from 1980-01-01 to 2022-12-31 that is not used for calibration.”

To aid the reader, we will succinctly repeat this information when the results are first introduced (additions in bold):

“Figure 1 shows the KGE scores obtained by the NWM as well as the 17 benchmark models. Performance is shown as Cumulative Distribution Functions (CDFs) for straightforward comparison of performance aggregated across all locations. **Results are shown for both the calibration period (up to water 5 years of data used, depending on data availability at each gauge) and the evaluation period (up to 37 water years).**”

3. Is there a difference between validation and evaluation periods?

“Validation” and “evaluation” are indeed used interchangeably throughout the manuscript. We will choose one and stick with it to prevent this confusion for other readers.

- Figure 3: Show what BMs are actually standing for; that’s not too much text for the figure.

We agree that this is more mysterious than it needs to be. We’ll add more descriptive titles, as also requested by reviewer 2. The NSE figure in the Supporting Information will be updated as well.
